# Supplementary material
Source: MDPI journal article supplement (https://www.mdpi.com/2073-4441/11/11/2205)
Supplement: s1 [file s1]

## Sheet: README
This template was developed to provide an accounting tool for rainwater harvesting pilot projects. The tool intakes site information and 5- or 15-minute precipitation and outputs an allowable harvest volume.
Sheet-by-sheet Instructions			Notes
1. "Inputs"--Using NRCS soil survey mapping, enter pervious and impervious area of each Hydrologic Soil Group into "Site Characteristics" table
2. "PrecipitationData"--Enter 1 day of precipitation data--with zeroes filled--covering midnight to midnight.			Use the appropriate sheet for your data: 5min or 15min
3. "StormCalculator"--This sheet processes precipitation into storm events using a 3-hour storm separation period. Data is linked to PrecipitationData sheet			No user input needed.
4. "ET-Soil Factor"--This sheet applies the monthly maximum harvest limit, summing Actual Harvest volume in a rolling 30-day period. User should link column D to pilot project storage log or manually enter actual harvest for each day. No other user input--the limit is linked into "ApplyRules."			Link to user's Storage Log or manually enter daily harvest
5. "Storage Log"--User must maintain 30+ day record of the volume of runoff stored at the pilot project for the ET-Soil Factor. Example logs and storage accounting is provided but this sheet should be adapted to fit your project.			User may design appropriate storage log. May link to reservoir operations or
6. "ApplyRules"--Factors for each soil group are automatically applied and the final total allowable harvest volume is return in cell AS11. The ET/Soil Factor maximum harvest is automatically applied based on user input in ongoing storage log			Storm events are linked to the StormCalculator15min sheet. For 5-min data, user can update links or copy/paste storm event table from "StormCalculator" each time.

## Sheet: Inputs
NRCS Soil Types/Hydrologic Soil Group
				NRCS Soil Type	NRCS Hydrologic Soil Group
	Inputs of soil types by HSG parsed by natural and developed areas. Sum of total developed area is necessary for rule application functions in other sheets.			Sand	A
				Loamy Sand	B
				Loam	C
				Silt Loam	C
				Sandy Loam	C
				Clay	D
				Sandy Clay	D
				Silty Clay	D
				Clay Loam	D
				Silty Clay Loam	D
				Sandy Clay Loam	D
																	9
Site Characteristics (Post Development)
	Separate Pervious Area (SPA)		80	40
	Receiving Pervious Area (RPA)		10	10
		Soil Type	Hydrologic Soil Group	Natural Pervious Area (Acres)	Developed Impervious Area (Acres)	Total Area (Acres)
	Soil 1	Sand	A	0.8	0.2	1
	Soil 2	Loamy Sand	B	4	2	6
	Soil 3	Loam	C	1.5	1.5	3
	Soil 4	Sandy Clay Loam	D	1	1	2
	Soil 5
				Total Developed Area (acres)	4.7
Storm Characteristics
				Precipiation Station
				Storm Separation Period
				3	hour
				Storm Depth Runoff Threshold
				0.1	inches
				Valid Storm Season
				Start Month	End Month
				3	10

## Sheet: PrecipitationData5min
Precipiation Station
Import Daily Precipitation Data
	5-minute
DateTime	Prc1	time_step		On-site precipitation must be in 5-min or 15-minute increments with all zeros filled in. Use the correct PrecipitationData tab to link to the appropriate StormCalculator.
		0
		5
		10
		15
		20
		25
		30
		35
		40
		45
		50
		55
		60
		65
		70
		75
		80
		85
		90
		95
		100
		105
		110
		115
		120
		125
		130
		135
		140
		145
		150
		155
		160
		165
		170
		175
		180
		185
		190
		195
		200
		205
		210
		215
		220
		225
		230
		235
		240
		245
		250
		255
		260
		265
		270
		275
		280
		285
		290
		295
		300
		305
		310
		315
		320
		325
		330
		335
		340
		345
		350
		355
		360
		365
		370
		375
		380
		385
		390
		395
		400
		405
		410
		415
		420
		425
		430
		435
		440
		445
		450
		455
		460
		465
		470
		475
		480
		485
		490
		495
		500
		505
		510
		515
		520
		525
		530
		535
		540
		545
		550
		555
		560
		565
		570
		575
		580
		585
		590
		595
		600
		605
		610
		615
		620
		625
		630
		635
		640
		645
		650
		655
		660
		665
		670
		675
		680
		685
		690
		695
		700
		705
		710
		715
		720
		725
		730
		735
		740
		745
		750
		755
		760
		765
		770
		775
		780
		785
		790
		795
		800
		805
		810
		815
		820
		825
		830
		835
		840
		845
		850
		855
		860
		865
		870
		875
		880
		885
		890
		895
		900
		905
		910
		915
		920
		925
		930
		935
		940
		945
		950
		955
		960
		965
		970
		975
		980
		985
		990
		995
		1000
		1005
		1010
		1015
		1020
		1025
		1030
		1035
		1040
		1045
		1050
		1055
		1060
		1065
		1070
		1075
		1080
		1085
		1090
		1095
		1100
		1105
		1110
		1115
		1120
		1125
		1130
		1135
		1140
		1145
		1150
		1155
		1160
		1165
		1170
		1175
		1180
		1185
		1190
		1195
		1200
		1205
		1210
		1215
		1220
		1225
		1230
		1235
		1240
		1245
		1250
		1255
		1260
		1265
		1270
		1275
		1280
		1285
		1290
		1295
		1300
		1305
		1310
		1315
		1320
		1325
		1330
		1335
		1340
		1345
		1350
		1355
		1360
		1365
		1370
		1375
		1380
		1385
		1390
		1395
		1400
		1405
		1410
		1415
		1420
		1425
		1430
		1435

## Sheet: PrecipitationData15min
Precipiation Station
Imported Daily Precipitation Data
	15 minute
DateTime	Prc1	time_step		On-site precipitation must be in 5-min or 15-minute increments with all zeros filled in. Use the correct PrecipitationData tab to link to the appropriate StormCalculator.
2015-10-01	0	0
2015-10-01 00:15:00	0.122	15
2015-10-01 00:29:59	0.212	20
2015-10-01 00:44:59	0.371	25
2015-10-01 00:59:59	0.663	30
2015-10-01 01:14:59	0.371	35
2015-10-01 01:29:59	0.212	40
2015-10-01 01:44:59	0.164	45
2015-10-01 01:59:59	0.133	50
2015-10-01 02:14:59	0.106	55
2015-10-01 02:29:59	0.106	60
2015-10-01 02:44:59	0.106	65
2015-10-01 02:59:59	0.053	70
2015-10-01 03:14:59	0.053	75
2015-10-01 03:29:59	0.032	80
2015-10-01 03:44:59	0.032	85
2015-10-01 03:59:59	0.032	90
2015-10-01 04:14:59	0.032	95
2015-10-01 04:29:59	0.032	100
2015-10-01 04:44:59	0.032	105
2015-10-01 04:59:59	0.032	110
2015-10-01 05:14:59	0.032	115
2015-10-01 05:29:59	0.032	120
2015-10-01 05:44:59	0	125
2015-10-01 05:59:59	0	130
2015-10-01 06:14:59	0	135
2015-10-01 06:29:59	0	140
2015-10-01 06:44:59	0	145
2015-10-01 06:59:59	0	150
2015-10-01 07:14:59	0	155
2015-10-01 07:29:59	0	160
2015-10-01 07:44:59	0	165
2015-10-01 07:59:59	0	170
2015-10-01 08:14:59	0	175
2015-10-01 08:29:59	0	180
2015-10-01 08:44:59	0	185
2015-10-01 08:59:59	0	190
2015-10-01 09:14:59	0	195
2015-10-01 09:29:59	0	200
2015-10-01 09:44:59	0	205
2015-10-01 09:59:59	0	210
2015-10-01 10:14:59	0	215
2015-10-01 10:29:59	0	220
2015-10-01 10:44:59	0	225
2015-10-01 10:59:59	0	230
2015-10-01 11:14:59	0	235
2015-10-01 11:29:59	0	240
2015-10-01 11:44:59	0	245
2015-10-01 11:59:59	0	250
2015-10-01 12:14:59	0	255
2015-10-01 12:29:59	0	260
2015-10-01 12:44:59	0	265
2015-10-01 12:59:59	0	270
2015-10-01 13:14:59	0	275
2015-10-01 13:29:59	0	280
2015-10-01 13:44:59	0	285
2015-10-01 13:59:59	0	290
2015-10-01 14:14:59	0	295
2015-10-01 14:29:59	0	300
2015-10-01 14:44:59	0	305
2015-10-01 14:59:59	0	310
2015-10-01 15:14:59	0	315
2015-10-01 15:29:59	0	320
2015-10-01 15:44:59	0	325
2015-10-01 15:59:59	0	330
2015-10-01 16:14:59	0	335
2015-10-01 16:29:59	0	340
2015-10-01 16:44:59	0	345
2015-10-01 16:59:59	0	350
2015-10-01 17:14:59	0	355
2015-10-01 17:29:59	0.08	360
2015-10-01 17:44:59	0.122	365
2015-10-01 17:59:59	0.212	370
2015-10-01 18:14:59	0.371	375
2015-10-01 18:29:59	0.663	380
2015-10-01 18:44:59	0	385
2015-10-01 18:59:59	0	390
2015-10-01 19:14:59	0	395
2015-10-01 19:29:59	0	400
2015-10-01 19:44:59	0	405
2015-10-01 19:59:59	0	410
2015-10-01 20:14:59	0	415
2015-10-01 20:29:59	0	420
2015-10-01 20:44:59	0	425
2015-10-01 20:59:59	0	430
2015-10-01 21:14:59	0	435
2015-10-01 21:29:59	0	440
2015-10-01 21:44:59	0	445
2015-10-01 21:59:59	0	450
2015-10-01 22:14:59	0	455
2015-10-01 22:29:59	0	460
2015-10-01 22:44:59	0	465
2015-10-01 22:59:59	0	470
2015-10-01 23:14:59	0	475
2015-10-01 23:29:59	0	480
2015-10-01 23:44:59	0	485

## Sheet: StormCalculator5min
Precipitation Data Imported Daily
DateTime	Prc1	time min	DateTime2	Precip y/n	Precip in previous 3hr y/n	Storm #	Serial Storm		Preliminary Pivot
00:00:00	0	0	00:00:00	0	1	0			Row Labels	Sum of Prc1	Min of DateTime2	Max of DateTime2		Serial Storm	Total Precip	Start Timestamp	End Timestamp	Duration (hrs)	Precip Threshold	Season Flag	Storm#	NewSerialStorm
00:00:00	0	5	00:00:00	0	1	0															#VALUE!	#VALUE!
00:00:00	0	10	00:00:00	0	1	0															#VALUE!	#VALUE!
00:00:00	0	15	00:00:00	0	1	0															#VALUE!	#VALUE!
00:00:00	0	20	00:00:00	0	1	0															#VALUE!	#VALUE!
00:00:00	0	25	00:00:00	0	1	0															#VALUE!	#VALUE!
00:00:00	0	30	00:00:00	0	1	0															#VALUE!	#VALUE!
00:00:00	0	35	00:00:00	0	1	0															#VALUE!	#VALUE!
00:00:00	0	40	00:00:00	0	1	0															#VALUE!	#VALUE!
00:00:00	0	45	00:00:00	0	1	0															#VALUE!	#VALUE!
00:00:00	0	50	00:00:00	0	1	0															#VALUE!	#VALUE!
00:00:00	0	55	00:00:00	0	1	0															#VALUE!	#VALUE!
00:00:00	0	60	00:00:00	0	1	0															#VALUE!	#VALUE!
00:00:00	0	65	00:00:00	0	1	0															#VALUE!	#VALUE!
00:00:00	0	70	00:00:00	0	1	0															#VALUE!	#VALUE!
00:00:00	0	75	00:00:00	0	1	0															#VALUE!	#VALUE!
00:00:00	0	80	00:00:00	0	1	0															#VALUE!	#VALUE!
00:00:00	0	85	00:00:00	0	1	0
00:00:00	0	90	00:00:00	0	1	0
00:00:00	0	95	00:00:00	0	1	0		This sheet processes precipitation data into storm events. This storm calculator is structured for 5-min precip. The 3-hour separation period parses the record into events when there is >3 hours with no precipitation.
00:00:00	0	100	00:00:00	0	1	0
00:00:00	0	105	00:00:00	0	1	0
00:00:00	0	110	00:00:00	0	1	0
00:00:00	0	115	00:00:00	0	1	0
00:00:00	0	120	00:00:00	0	1	0
00:00:00	0	125	00:00:00	0	1	0
00:00:00	0	130	00:00:00	0	1	0
00:00:00	0	135	00:00:00	0	1	0
00:00:00	0	140	00:00:00	0	1	0
00:00:00	0	145	00:00:00	0	1	0
00:00:00	0	150	00:00:00	0	1	0
00:00:00	0	155	00:00:00	0	1	0
00:00:00	0	160	00:00:00	0	1	0
00:00:00	0	165	00:00:00	0	1	0
00:00:00	0	170	00:00:00	0	1	0
00:00:00	0	175	00:00:00	0	1	0
00:00:00	0	180	00:00:00	0	1	0
00:00:00	0	185	00:00:00	0	1	0
00:00:00	0	190	00:00:00	0	1	0
00:00:00	0	195	00:00:00	0	1	0
00:00:00	0	200	00:00:00	0	1	0
00:00:00	0	205	00:00:00	0	1	0
00:00:00	0	210	00:00:00	0	1	0
00:00:00	0	215	00:00:00	0	1	0
00:00:00	0	220	00:00:00	0	1	0
00:00:00	0	225	00:00:00	0	1	0
00:00:00	0	230	00:00:00	0	1	0
00:00:00	0	235	00:00:00	0	1	0
00:00:00	0	240	00:00:00	0	1	0
00:00:00	0	245	00:00:00	0	1	0
00:00:00	0	250	00:00:00	0	1	0
00:00:00	0	255	00:00:00	0	1	0
00:00:00	0	260	00:00:00	0	1	0
00:00:00	0	265	00:00:00	0	1	0
00:00:00	0	270	00:00:00	0	1	0
00:00:00	0	275	00:00:00	0	1	0
00:00:00	0	280	00:00:00	0	1	0
00:00:00	0	285	00:00:00	0	1	0
00:00:00	0	290	00:00:00	0	1	0
00:00:00	0	295	00:00:00	0	1	0
00:00:00	0	300	00:00:00	0	1	0
00:00:00	0	305	00:00:00	0	1	0
00:00:00	0	310	00:00:00	0	1	0
00:00:00	0	315	00:00:00	0	1	0
00:00:00	0	320	00:00:00	0	1	0
00:00:00	0	325	00:00:00	0	1	0
00:00:00	0	330	00:00:00	0	1	0
00:00:00	0	335	00:00:00	0	1	0
00:00:00	0	340	00:00:00	0	1	0
00:00:00	0	345	00:00:00	0	1	0
00:00:00	0	350	00:00:00	0	1	0
00:00:00	0	355	00:00:00	0	1	0
00:00:00	0	360	00:00:00	0	1	0
00:00:00	0	365	00:00:00	0	1	0
00:00:00	0	370	00:00:00	0	1	0
00:00:00	0	375	00:00:00	0	1	0
00:00:00	0	380	00:00:00	0	1	0
00:00:00	0	385	00:00:00	0	1	0
00:00:00	0	390	00:00:00	0	1	0
00:00:00	0	395	00:00:00	0	1	0
00:00:00	0	400	00:00:00	0	1	0
00:00:00	0	405	00:00:00	0	1	0
00:00:00	0	410	00:00:00	0	1	0
00:00:00	0	415	00:00:00	0	1	0
00:00:00	0	420	00:00:00	0	1	0
00:00:00	0	425	00:00:00	0	1	0
00:00:00	0	430	00:00:00	0	1	0
00:00:00	0	435	00:00:00	0	1	0
00:00:00	0	440	00:00:00	0	1	0
00:00:00	0	445	00:00:00	0	1	0
00:00:00	0	450	00:00:00	0	1	0
00:00:00	0	455	00:00:00	0	1	0
00:00:00	0	460	00:00:00	0	1	0
00:00:00	0	465	00:00:00	0	1	0
00:00:00	0	470	00:00:00	0	1	0
00:00:00	0	475	00:00:00	0	1	0
00:00:00	0	480	00:00:00	0	1	0
00:00:00	0	485	00:00:00	0	1	0
00:00:00	0	490	00:00:00	0	1	0
00:00:00	0	495	00:00:00	0	1	0
00:00:00	0	500	00:00:00	0	1	0
00:00:00	0	505	00:00:00	0	1	0
00:00:00	0	510	00:00:00	0	1	0
00:00:00	0	515	00:00:00	0	1	0
00:00:00	0	520	00:00:00	0	1	0
00:00:00	0	525	00:00:00	0	1	0
00:00:00	0	530	00:00:00	0	1	0
00:00:00	0	535	00:00:00	0	1	0
00:00:00	0	540	00:00:00	0	1	0
00:00:00	0	545	00:00:00	0	1	0
00:00:00	0	550	00:00:00	0	1	0
00:00:00	0	555	00:00:00	0	1	0
00:00:00	0	560	00:00:00	0	1	0
00:00:00	0	565	00:00:00	0	1	0
00:00:00	0	570	00:00:00	0	1	0
00:00:00	0	575	00:00:00	0	1	0
00:00:00	0	580	00:00:00	0	1	0
00:00:00	0	585	00:00:00	0	1	0
00:00:00	0	590	00:00:00	0	1	0
00:00:00	0	595	00:00:00	0	1	0
00:00:00	0	600	00:00:00	0	1	0
00:00:00	0	605	00:00:00	0	1	0
00:00:00	0	610	00:00:00	0	1	0
00:00:00	0	615	00:00:00	0	1	0
00:00:00	0	620	00:00:00	0	1	0
00:00:00	0	625	00:00:00	0	1	0
00:00:00	0	630	00:00:00	0	1	0
00:00:00	0	635	00:00:00	0	1	0
00:00:00	0	640	00:00:00	0	1	0
00:00:00	0	645	00:00:00	0	1	0
00:00:00	0	650	00:00:00	0	1	0
00:00:00	0	655	00:00:00	0	1	0
00:00:00	0	660	00:00:00	0	1	0
00:00:00	0	665	00:00:00	0	1	0
00:00:00	0	670	00:00:00	0	1	0
00:00:00	0	675	00:00:00	0	1	0
00:00:00	0	680	00:00:00	0	1	0
00:00:00	0	685	00:00:00	0	1	0
00:00:00	0	690	00:00:00	0	1	0
00:00:00	0	695	00:00:00	0	1	0
00:00:00	0	700	00:00:00	0	1	0
00:00:00	0	705	00:00:00	0	1	0
00:00:00	0	710	00:00:00	0	1	0
00:00:00	0	715	00:00:00	0	1	0
00:00:00	0	720	00:00:00	0	1	0
00:00:00	0	725	00:00:00	0	1	0
00:00:00	0	730	00:00:00	0	1	0
00:00:00	0	735	00:00:00	0	1	0
00:00:00	0	740	00:00:00	0	1	0
00:00:00	0	745	00:00:00	0	1	0
00:00:00	0	750	00:00:00	0	1	0
00:00:00	0	755	00:00:00	0	1	0
00:00:00	0	760	00:00:00	0	1	0
00:00:00	0	765	00:00:00	0	1	0
00:00:00	0	770	00:00:00	0	1	0
00:00:00	0	775	00:00:00	0	1	0
00:00:00	0	780	00:00:00	0	1	0
00:00:00	0	785	00:00:00	0	1	0
00:00:00	0	790	00:00:00	0	1	0
00:00:00	0	795	00:00:00	0	1	0
00:00:00	0	800	00:00:00	0	1	0
00:00:00	0	805	00:00:00	0	1	0
00:00:00	0	810	00:00:00	0	1	0
00:00:00	0	815	00:00:00	0	1	0
00:00:00	0	820	00:00:00	0	1	0
00:00:00	0	825	00:00:00	0	1	0
00:00:00	0	830	00:00:00	0	1	0
00:00:00	0	835	00:00:00	0	1	0
00:00:00	0	840	00:00:00	0	1	0
00:00:00	0	845	00:00:00	0	1	0
00:00:00	0	850	00:00:00	0	1	0
00:00:00	0	855	00:00:00	0	1	0
00:00:00	0	860	00:00:00	0	1	0
00:00:00	0	865	00:00:00	0	1	0
00:00:00	0	870	00:00:00	0	1	0
00:00:00	0	875	00:00:00	0	1	0
00:00:00	0	880	00:00:00	0	1	0
00:00:00	0	885	00:00:00	0	1	0
00:00:00	0	890	00:00:00	0	1	0
00:00:00	0	895	00:00:00	0	1	0
00:00:00	0	900	00:00:00	0	1	0
00:00:00	0	905	00:00:00	0	1	0
00:00:00	0	910	00:00:00	0	1	0
00:00:00	0	915	00:00:00	0	1	0
00:00:00	0	920	00:00:00	0	1	0
00:00:00	0	925	00:00:00	0	1	0
00:00:00	0	930	00:00:00	0	1	0
00:00:00	0	935	00:00:00	0	1	0
00:00:00	0	940	00:00:00	0	1	0
00:00:00	0	945	00:00:00	0	1	0
00:00:00	0	950	00:00:00	0	1	0
00:00:00	0	955	00:00:00	0	1	0
00:00:00	0	960	00:00:00	0	1	0
00:00:00	0	965	00:00:00	0	1	0
00:00:00	0	970	00:00:00	0	1	0
00:00:00	0	975	00:00:00	0	1	0
00:00:00	0	980	00:00:00	0	1	0
00:00:00	0	985	00:00:00	0	1	0
00:00:00	0	990	00:00:00	0	1	0
00:00:00	0	995	00:00:00	0	1	0
00:00:00	0	1000	00:00:00	0	1	0
00:00:00	0	1005	00:00:00	0	1	0
00:00:00	0	1010	00:00:00	0	1	0
00:00:00	0	1015	00:00:00	0	1	0
00:00:00	0	1020	00:00:00	0	1	0
00:00:00	0	1025	00:00:00	0	1	0
00:00:00	0	1030	00:00:00	0	1	0
00:00:00	0	1035	00:00:00	0	1	0
00:00:00	0	1040	00:00:00	0	1	0
00:00:00	0	1045	00:00:00	0	1	0
00:00:00	0	1050	00:00:00	0	1	0
00:00:00	0	1055	00:00:00	0	1	0
00:00:00	0	1060	00:00:00	0	1	0
00:00:00	0	1065	00:00:00	0	1	0
00:00:00	0	1070	00:00:00	0	1	0
00:00:00	0	1075	00:00:00	0	1	0
00:00:00	0	1080	00:00:00	0	1	0
00:00:00	0	1085	00:00:00	0	1	0
00:00:00	0	1090	00:00:00	0	1	0
00:00:00	0	1095	00:00:00	0	1	0
00:00:00	0	1100	00:00:00	0	1	0
00:00:00	0	1105	00:00:00	0	1	0
00:00:00	0	1110	00:00:00	0	1	0
00:00:00	0	1115	00:00:00	0	1	0
00:00:00	0	1120	00:00:00	0	1	0
00:00:00	0	1125	00:00:00	0	1	0
00:00:00	0	1130	00:00:00	0	1	0
00:00:00	0	1135	00:00:00	0	1	0
00:00:00	0	1140	00:00:00	0	1	0
00:00:00	0	1145	00:00:00	0	1	0
00:00:00	0	1150	00:00:00	0	1	0
00:00:00	0	1155	00:00:00	0	1	0
00:00:00	0	1160	00:00:00	0	1	0
00:00:00	0	1165	00:00:00	0	1	0
00:00:00	0	1170	00:00:00	0	1	0
00:00:00	0	1175	00:00:00	0	1	0
00:00:00	0	1180	00:00:00	0	1	0
00:00:00	0	1185	00:00:00	0	1	0
00:00:00	0	1190	00:00:00	0	1	0
00:00:00	0	1195	00:00:00	0	1	0
00:00:00	0	1200	00:00:00	0	1	0
00:00:00	0	1205	00:00:00	0	1	0
00:00:00	0	1210	00:00:00	0	1	0
00:00:00	0	1215	00:00:00	0	1	0
00:00:00	0	1220	00:00:00	0	1	0
00:00:00	0	1225	00:00:00	0	1	0
00:00:00	0	1230	00:00:00	0	1	0
00:00:00	0	1235	00:00:00	0	1	0
00:00:00	0	1240	00:00:00	0	1	0
00:00:00	0	1245	00:00:00	0	1	0
00:00:00	0	1250	00:00:00	0	1	0
00:00:00	0	1255	00:00:00	0	1	0
00:00:00	0	1260	00:00:00	0	1	0
00:00:00	0	1265	00:00:00	0	1	0
00:00:00	0	1270	00:00:00	0	1	0
00:00:00	0	1275	00:00:00	0	1	0
00:00:00	0	1280	00:00:00	0	1	0
00:00:00	0	1285	00:00:00	0	1	0
00:00:00	0	1290	00:00:00	0	1	0
00:00:00	0	1295	00:00:00	0	1	0
00:00:00	0	1300	00:00:00	0	1	0
00:00:00	0	1305	00:00:00	0	1	0
00:00:00	0	1310	00:00:00	0	1	0
00:00:00	0	1315	00:00:00	0	1	0
00:00:00	0	1320	00:00:00	0	1	0
00:00:00	0	1325	00:00:00	0	1	0
00:00:00	0	1330	00:00:00	0	1	0
00:00:00	0	1335	00:00:00	0	1	0
00:00:00	0	1340	00:00:00	0	1	0
00:00:00	0	1345	00:00:00	0	1	0
00:00:00	0	1350	00:00:00	0	1	0
00:00:00	0	1355	00:00:00	0	1	0
00:00:00	0	1360	00:00:00	0	1	0
00:00:00	0	1365	00:00:00	0	1	0
00:00:00	0	1370	00:00:00	0	1	0
00:00:00	0	1375	00:00:00	0	1	0
00:00:00	0	1380	00:00:00	0	1	0
00:00:00	0	1385	00:00:00	0	1	0
00:00:00	0	1390	00:00:00	0	1	0
00:00:00	0	1395	00:00:00	0	1	0
00:00:00	0	1400	00:00:00	0	1	0
00:00:00	0	1405	00:00:00	0	1	0
00:00:00	0	1410	00:00:00	0	1	0
00:00:00	0	1415	00:00:00	0	1	0
00:00:00	0	1420	00:00:00	0	1	0
00:00:00	0	1425	00:00:00	0	1	0
00:00:00	0	1430	00:00:00	0	1	0
00:00:00	0	1435	00:00:00	0	1	0

## Sheet: StormCalculator15min
Precipitation Data Imported Daily
DateTime	Prc1	time min	DateTime2	Precip y/n	StormSeparation 3hr y/n	Storm #	Serial Storm		Preliminary Pivot
2015-10-01	0	0	2015-10-01	0	1	0			Row Labels	Sum of Prc1	Min of DateTime2	Max of DateTime2		Serial Storm	Total Precip	Start Timestamp	End Timestamp	Duration (hrs)	Precip Threshold	Season Flag	Storm#	NewSerialStorm
2015-10-01 00:15:00	0.122	15	2015-10-01 00:15:00	1	1	1	1		1	2.96	2015-10-01 00:15:00	2015-10-01 05:30:00		1	2.96	2015-10-01 00:15:00	2015-10-01 05:30:00	5.25	1	1	1	1
2015-10-01 00:29:59	0.212	20	2015-10-01 00:29:59	1	0	1	1		2	1.448	2015-10-01 17:30:00	2015-10-01 18:30:00		2	1.448	2015-10-01 17:30:00	2015-10-01 18:30:00	1	1	1	2	2
2015-10-01 00:44:59	0.371	25	2015-10-01 00:44:59	1	0	1	1														#VALUE!	#VALUE!
2015-10-01 00:59:59	0.663	30	2015-10-01 00:59:59	1	0	1	1														#VALUE!	#VALUE!
2015-10-01 01:14:59	0.371	35	2015-10-01 01:14:59	1	0	1	1														#VALUE!	#VALUE!
2015-10-01 01:29:59	0.212	40	2015-10-01 01:29:59	1	0	1	1														#VALUE!	#VALUE!
2015-10-01 01:44:59	0.164	45	2015-10-01 01:44:59	1	0	1	1														#VALUE!	#VALUE!
2015-10-01 01:59:59	0.133	50	2015-10-01 01:59:59	1	0	1	1														#VALUE!	#VALUE!
2015-10-01 02:14:59	0.106	55	2015-10-01 02:14:59	1	0	1	1														#VALUE!	#VALUE!
2015-10-01 02:29:59	0.106	60	2015-10-01 02:29:59	1	0	1	1														#VALUE!	#VALUE!
2015-10-01 02:44:59	0.106	65	2015-10-01 02:44:59	1	0	1	1														#VALUE!	#VALUE!
2015-10-01 02:59:59	0.053	70	2015-10-01 02:59:59	1	0	1	1														#VALUE!	#VALUE!
2015-10-01 03:14:59	0.053	75	2015-10-01 03:14:59	1	0	1	1														#VALUE!	#VALUE!
2015-10-01 03:29:59	0.032	80	2015-10-01 03:29:59	1	0	1	1														#VALUE!	#VALUE!
2015-10-01 03:44:59	0.032	85	2015-10-01 03:44:59	1	0	1	1														#VALUE!	#VALUE!
2015-10-01 03:59:59	0.032	90	2015-10-01 03:59:59	1	0	1	1														#VALUE!	#VALUE!
2015-10-01 04:14:59	0.032	95	2015-10-01 04:14:59	1	0	1	1
2015-10-01 04:29:59	0.032	100	2015-10-01 04:29:59	1	0	1	1
2015-10-01 04:44:59	0.032	105	2015-10-01 04:44:59	1	0	1	1	This sheet processes precipitation data into storm events. This storm calculator is structured for 15-min precip. The 3-hour separation period parses the record into events when there is >3 hours with no precipitation.
2015-10-01 04:59:59	0.032	110	2015-10-01 04:59:59	1	0	1	1
2015-10-01 05:14:59	0.032	115	2015-10-01 05:14:59	1	0	1	1
2015-10-01 05:29:59	0.032	120	2015-10-01 05:29:59	1	0	1	1
2015-10-01 05:44:59	0	125	2015-10-01 05:44:59	0	0	1
2015-10-01 05:59:59	0	130	2015-10-01 05:59:59	0	0	1
2015-10-01 06:14:59	0	135	2015-10-01 06:14:59	0	0	1
2015-10-01 06:29:59	0	140	2015-10-01 06:29:59	0	0	1
2015-10-01 06:44:59	0	145	2015-10-01 06:44:59	0	0	1
2015-10-01 06:59:59	0	150	2015-10-01 06:59:59	0	0	1
2015-10-01 07:14:59	0	155	2015-10-01 07:14:59	0	0	1
2015-10-01 07:29:59	0	160	2015-10-01 07:29:59	0	0	1
2015-10-01 07:44:59	0	165	2015-10-01 07:44:59	0	0	1
2015-10-01 07:59:59	0	170	2015-10-01 07:59:59	0	0	1
2015-10-01 08:14:59	0	175	2015-10-01 08:14:59	0	0	1
2015-10-01 08:29:59	0	180	2015-10-01 08:29:59	0	1	1
2015-10-01 08:44:59	0	185	2015-10-01 08:44:59	0	1	1
2015-10-01 08:59:59	0	190	2015-10-01 08:59:59	0	1	1
2015-10-01 09:14:59	0	195	2015-10-01 09:14:59	0	1	1
2015-10-01 09:29:59	0	200	2015-10-01 09:29:59	0	1	1
2015-10-01 09:44:59	0	205	2015-10-01 09:44:59	0	1	1
2015-10-01 09:59:59	0	210	2015-10-01 09:59:59	0	1	1
2015-10-01 10:14:59	0	215	2015-10-01 10:14:59	0	1	1
2015-10-01 10:29:59	0	220	2015-10-01 10:29:59	0	1	1
2015-10-01 10:44:59	0	225	2015-10-01 10:44:59	0	1	1
2015-10-01 10:59:59	0	230	2015-10-01 10:59:59	0	1	1
2015-10-01 11:14:59	0	235	2015-10-01 11:14:59	0	1	1
2015-10-01 11:29:59	0	240	2015-10-01 11:29:59	0	1	1
2015-10-01 11:44:59	0	245	2015-10-01 11:44:59	0	1	1
2015-10-01 11:59:59	0	250	2015-10-01 11:59:59	0	1	1
2015-10-01 12:14:59	0	255	2015-10-01 12:14:59	0	1	1
2015-10-01 12:29:59	0	260	2015-10-01 12:29:59	0	1	1
2015-10-01 12:44:59	0	265	2015-10-01 12:44:59	0	1	1
2015-10-01 12:59:59	0	270	2015-10-01 12:59:59	0	1	1
2015-10-01 13:14:59	0	275	2015-10-01 13:14:59	0	1	1
2015-10-01 13:29:59	0	280	2015-10-01 13:29:59	0	1	1
2015-10-01 13:44:59	0	285	2015-10-01 13:44:59	0	1	1
2015-10-01 13:59:59	0	290	2015-10-01 13:59:59	0	1	1
2015-10-01 14:14:59	0	295	2015-10-01 14:14:59	0	1	1
2015-10-01 14:29:59	0	300	2015-10-01 14:29:59	0	1	1
2015-10-01 14:44:59	0	305	2015-10-01 14:44:59	0	1	1
2015-10-01 14:59:59	0	310	2015-10-01 14:59:59	0	1	1
2015-10-01 15:14:59	0	315	2015-10-01 15:14:59	0	1	1
2015-10-01 15:29:59	0	320	2015-10-01 15:29:59	0	1	1
2015-10-01 15:44:59	0	325	2015-10-01 15:44:59	0	1	1
2015-10-01 15:59:59	0	330	2015-10-01 15:59:59	0	1	1
2015-10-01 16:14:59	0	335	2015-10-01 16:14:59	0	1	1
2015-10-01 16:29:59	0	340	2015-10-01 16:29:59	0	1	1
2015-10-01 16:44:59	0	345	2015-10-01 16:44:59	0	1	1
2015-10-01 16:59:59	0	350	2015-10-01 16:59:59	0	1	1
2015-10-01 17:14:59	0	355	2015-10-01 17:14:59	0	1	1
2015-10-01 17:29:59	0.08	360	2015-10-01 17:29:59	1	1	2	2
2015-10-01 17:44:59	0.122	365	2015-10-01 17:44:59	1	0	2	2
2015-10-01 17:59:59	0.212	370	2015-10-01 17:59:59	1	0	2	2
2015-10-01 18:14:59	0.371	375	2015-10-01 18:14:59	1	0	2	2
2015-10-01 18:29:59	0.663	380	2015-10-01 18:29:59	1	0	2	2
2015-10-01 18:44:59	0	385	2015-10-01 18:44:59	0	0	2
2015-10-01 18:59:59	0	390	2015-10-01 18:59:59	0	0	2
2015-10-01 19:14:59	0	395	2015-10-01 19:14:59	0	0	2
2015-10-01 19:29:59	0	400	2015-10-01 19:29:59	0	0	2
2015-10-01 19:44:59	0	405	2015-10-01 19:44:59	0	0	2
2015-10-01 19:59:59	0	410	2015-10-01 19:59:59	0	0	2
2015-10-01 20:14:59	0	415	2015-10-01 20:14:59	0	0	2
2015-10-01 20:29:59	0	420	2015-10-01 20:29:59	0	0	2
2015-10-01 20:44:59	0	425	2015-10-01 20:44:59	0	0	2
2015-10-01 20:59:59	0	430	2015-10-01 20:59:59	0	0	2
2015-10-01 21:14:59	0	435	2015-10-01 21:14:59	0	0	2
2015-10-01 21:29:59	0	440	2015-10-01 21:29:59	0	1	2
2015-10-01 21:44:59	0	445	2015-10-01 21:44:59	0	1	2
2015-10-01 21:59:59	0	450	2015-10-01 21:59:59	0	1	2
2015-10-01 22:14:59	0	455	2015-10-01 22:14:59	0	1	2
2015-10-01 22:29:59	0	460	2015-10-01 22:29:59	0	1	2
2015-10-01 22:44:59	0	465	2015-10-01 22:44:59	0	1	2
2015-10-01 22:59:59	0	470	2015-10-01 22:59:59	0	1	2
2015-10-01 23:14:59	0	475	2015-10-01 23:14:59	0	1	2
2015-10-01 23:29:59	0	480	2015-10-01 23:29:59	0	1	2
2015-10-01 23:44:59	0	485	2015-10-01 23:44:59	0	1	2

## Sheet: ET-Soil Factor
		Month	Mar	Apr	May	June	July	Aug	Sep	Oct
		Month	3	4	5	6	7	8	9	10
ET/Soil Factor		inches	1.4	3.9	5.4	6	6	5.8	4	1.5
ET/Soil Factor		acre-ft	6.58	18.33	25.38	28.2	28.2	27.26	18.8	7.05
Rolling 30-day total; 30-day limit weighted by day of month.
			Link Harvest to storage spreadsheet
Month	Day	Weighted ET/Soil Factor AF	Actual Harvest AF	30-day total AF	Allowable Harvest AF			This sheet provides the 30-day maximum harvest limit for each day in the harvesting season. The daily limit is based on the monthly limits weighted by the number of days in each month in a 30-day period ending that day.
3	1	6.58	1.19	1.19	5.39
3	2	6.58	0.19	1.38	5.2
3	3	6.58	0	1.38	5.2
3	4	6.58	0	1.38	5.2
3	5	6.58	0	1.38	5.2
3	6	6.58	0	1.38	5.2
3	7	6.58	0	1.38	5.2
3	8	6.58	0	1.38	5.2
3	9	6.58	0	1.38	5.2
3	10	6.58	0	1.38	5.2
3	11	6.58	0	1.38	5.2
3	12	6.58	0	1.38	5.2
3	13	6.58	0	1.38	5.2
3	14	6.58	0	1.38	5.2
3	15	6.58	0	1.38	5.2
3	16	6.58	0	1.38	5.2
3	17	6.58	0	1.38	5.2
3	18	6.58	0	1.38	5.2
3	19	6.58	0	1.38	5.2
3	20	6.58	0	1.38	5.2
3	21	6.58	0	1.38	5.2
3	22	6.58	0	1.38	5.2
3	23	6.58	0	1.38	5.2
3	24	6.58	0	1.38	5.2
3	25	6.58	0	1.38	5.2
3	26	6.58	0	1.38	5.2
3	27	6.58	0	1.38	5.2
3	28	6.58	0	1.38	5.2
3	29	6.58	0	1.38	5.2
3	30	6.58	0	1.38	5.2
3	31	6.58	0	0.19	6.39
4	1	6.97167	0	0	6.97167
4	2	7.36333	0	0	7.36333
4	3	7.755	0	0	7.755
4	4	8.14667	0	0	8.14667
4	5	8.53833	0	0	8.53833
4	6	8.93	0	0	8.93
4	7	9.32167	0	0	9.32167
4	8	9.71333	0	0	9.71333
4	9	10.105	0	0	10.105
4	10	10.4967	0	0	10.4967
4	11	10.8883	0	0	10.8883
4	12	11.28	0	0	11.28
4	13	11.6717	0	0	11.6717
4	14	12.0633	0	0	12.0633
4	15	12.455	0	0	12.455
4	16	12.8467	0	0	12.8467
4	17	13.2383	0	0	13.2383
4	18	13.63	0	0	13.63
4	19	14.0217	0	0	14.0217
4	20	14.4133		0	14.4133
4	21	14.805	0	0	14.805
4	22	15.1967	0	0	15.1967
4	23	15.5883	0	0	15.5883
4	24	15.98	0	0	15.98
4	25	16.3717	0	0	16.3717
4	26	16.7633	0	0	16.7633
4	27	17.155	0	0	17.155
4	28	17.5467	0	0	17.5467
4	29	17.9383	0	0	17.9383
4	30	18.33	0	0	18.33
5	1	6.97167	0	0	6.97167
5	2	7.36333	0	0	7.36333
5	3	7.755	0	0	7.755
5	4	8.14667	0	0	8.14667
5	5	8.53833	0	0	8.53833
5	6	8.93	0	0	8.93
5	7	9.32167	0	0	9.32167
5	8	9.71333	0	0	9.71333
5	9	10.105	0	0	10.105
5	10	10.4967	0	0	10.4967
5	11	10.8883	0	0	10.8883
5	12	11.28	0	0	11.28
5	13	11.6717	0	0	11.6717
5	14	12.0633	0	0	12.0633
5	15	12.455	0	0	12.455
5	16	12.8467	0	0	12.8467
5	17	13.2383	0	0	13.2383
5	18	13.63	0	0	13.63
5	19	14.0217	0	0	14.0217
5	20	14.4133	0	0	14.4133
5	21	14.805	0	0	14.805
5	22	15.1967	0	0	15.1967
5	23	15.5883	0	0	15.5883
5	24	15.98	0	0	15.98
5	25	16.3717	0	0	16.3717
5	26	16.7633	0	0	16.7633
5	27	17.155	0	0	17.155
5	28	17.5467	0	0	17.5467
5	29	17.9383	0	0	17.9383
5	30	18.33	0	0	18.33
5	31	18.7217	0	0	18.7217
6	1	6.97167	0	0	6.97167
6	2	7.36333	0	0	7.36333
6	3	7.755	0	0	7.755
6	4	8.14667	0	0	8.14667
6	5	8.53833	0	0	8.53833
6	6	8.93	0	0	8.93
6	7	9.32167	0	0	9.32167
6	8	9.71333	0	0	9.71333
6	9	10.105	0	0	10.105
6	10	10.4967	0	0	10.4967
6	11	10.8883	0	0	10.8883
6	12	11.28	0	0	11.28
6	13	11.6717	0	0	11.6717
6	14	12.0633	0	0	12.0633
6	15	12.455	0	0	12.455
6	16	12.8467	0	0	12.8467
6	17	13.2383	0	0	13.2383
6	18	13.63	0	0	13.63
6	19	14.0217	0	0	14.0217
6	20	14.4133	0	0	14.4133
6	21	14.805	0	0	14.805
6	22	15.1967	0	0	15.1967
6	23	15.5883	0	0	15.5883
6	24	15.98	0	0	15.98
6	25	16.3717	0	0	16.3717
6	26	16.7633	0	0	16.7633
6	27	17.155	0	0	17.155
6	28	17.5467	0	0	17.5467
6	29	17.9383	0	0	17.9383
6	30	18.33	0	0	18.33
7	1	6.97167	0	0	6.97167
7	2	7.36333	0	0	7.36333
7	3	7.755	0	0	7.755
7	4	8.14667	0	0	8.14667
7	5	8.53833	0	0	8.53833
7	6	8.93	0	0	8.93
7	7	9.32167	0	0	9.32167
7	8	9.71333	0	0	9.71333
7	9	10.105	0	0	10.105
7	10	10.4967	0	0	10.4967
7	11	10.8883	0	0	10.8883
7	12	11.28	0	0	11.28
7	13	11.6717	0	0	11.6717
7	14	12.0633	0	0	12.0633
7	15	12.455	0	0	12.455
7	16	12.8467	0	0	12.8467
7	17	13.2383	0	0	13.2383
7	18	13.63	0	0	13.63
7	19	14.0217	0	0	14.0217
7	20	14.4133	0	0	14.4133
7	21	14.805	0	0	14.805
7	22	15.1967	0	0	15.1967
7	23	15.5883	0	0	15.5883
7	24	15.98	0	0	15.98
7	25	16.3717	0	0	16.3717
7	26	16.7633	0	0	16.7633
7	27	17.155	0	0	17.155
7	28	17.5467	0	0	17.5467
7	29	17.9383	0	0	17.9383
7	30	18.33	0	0	18.33
7	31	18.7217	0	0	18.7217
8	1	6.97167	0	0	6.97167
8	2	7.36333	0	0	7.36333
8	3	7.755	0	0	7.755
8	4	8.14667	0	0	8.14667
8	5	8.53833	0	0	8.53833
8	6	8.93	0	0	8.93
8	7	9.32167	0	0	9.32167
8	8	9.71333	0	0	9.71333
8	9	10.105	0	0	10.105
8	10	10.4967	0	0	10.4967
8	11	10.8883	0	0	10.8883
8	12	11.28	0	0	11.28
8	13	11.6717	0	0	11.6717
8	14	12.0633	0	0	12.0633
8	15	12.455	0	0	12.455
8	16	12.8467	0	0	12.8467
8	17	13.2383	0	0	13.2383
8	18	13.63	0	0	13.63
8	19	14.0217	0	0	14.0217
8	20	14.4133	0	0	14.4133
8	21	14.805	0	0	14.805
8	22	15.1967	0	0	15.1967
8	23	15.5883	0	0	15.5883
8	24	15.98	0	0	15.98
8	25	16.3717	0	0	16.3717
8	26	16.7633	0	0	16.7633
8	27	17.155	0	0	17.155
8	28	17.5467	0	0	17.5467
8	29	17.9383	0	0	17.9383
8	30	18.33	0	0	18.33
8	31	18.7217	0	0	18.7217
9	1	6.97167	0	0	6.97167
9	2	7.36333	0	0	7.36333
9	3	7.755	0	0	7.755
9	4	8.14667	0	0	8.14667
9	5	8.53833	0	0	8.53833
9	6	8.93	0	0	8.93
9	7	9.32167	0	0	9.32167
9	8	9.71333	0	0	9.71333
9	9	10.105	0	0	10.105
9	10	10.4967	0	0	10.4967
9	11	10.8883	0	0	10.8883
9	12	11.28	0	0	11.28
9	13	11.6717	0	0	11.6717
9	14	12.0633	0	0	12.0633
9	15	12.455	0	0	12.455
9	16	12.8467	0	0	12.8467
9	17	13.2383	0	0	13.2383
9	18	13.63	0	0	13.63
9	19	14.0217	0	0	14.0217
9	20	14.4133	0	0	14.4133
9	21	14.805	0	0	14.805
9	22	15.1967	0	0	15.1967
9	23	15.5883	0	0	15.5883
9	24	15.98	0	0	15.98
9	25	16.3717	0	0	16.3717
9	26	16.7633	0	0	16.7633
9	27	17.155	0	0	17.155
9	28	17.5467	0	0	17.5467
9	29	17.9383	0	0	17.9383
9	30	18.33	0	0	18.33
10	1	6.97167	0	0	6.97167
10	2	7.36333	0	0	7.36333
10	3	7.755	0	0	7.755
10	4	8.14667	0	0	8.14667
10	5	8.53833	0	0	8.53833
10	6	8.93	0	0	8.93
10	7	9.32167	0	0	9.32167
10	8	9.71333	0	0	9.71333
10	9	10.105	0	0	10.105
10	10	10.4967	0	0	10.4967
10	11	10.8883	0	0	10.8883
10	12	11.28	0	0	11.28
10	13	11.6717	0	0	11.6717
10	14	12.0633	0	0	12.0633
10	15	12.455	0	0	12.455
10	16	12.8467	0	0	12.8467
10	17	13.2383	0	0	13.2383
10	18	13.63	0	0	13.63
10	19	14.0217	0	0	14.0217
10	20	14.4133	0	0	14.4133
10	21	14.805	0	0	14.805
10	22	15.1967	0	0	15.1967
10	23	15.5883	0	0	15.5883
10	24	15.98	0	0	15.98
10	25	16.3717	0	0	16.3717
10	26	16.7633	0	0	16.7633
10	27	17.155	0	0	17.155
10	28	17.5467	0	0	17.5467
10	29	17.9383	0	0	17.9383
10	30	18.33	0	0	18.33
10	31	18.7217	0	0	18.7217

## Sheet: StorageLog_example
Operator to set up storage pond accounting to report AF of harvest each day. Daily harvest is limited to the smaller volume of Factor Allowable Harvest (cell AS11 in ApplyRules) and the ET-Soil Rule (cell AP6 in ApplyRules). Storage accounting will vary by pilot project, but management should ensure reporting of actual harvest volume each day.									> Example storage operations & accounting from LRE's CWP grant deliverables	Beg. of Day Elevation (feet)	Beg of Day Storage (af)	Calculated Inflows (+) Losses (-) (af)	Evap (af)	Pumped to non-potable demand (af)	Released Natural Runoff (af)	End of Day Elevation (feet)	End of Day Storage (af)	Amt Released (af)	Augmentation Release (af)	Amount owed the stream (af)	Target Storage Amount w/o Pumping (af)	Target Gage Height (feet)	Captured Precipitation Runoff (af)	< This column feeds ET-Soil_Rule
Example										(o)	(p)	(q)	(r)	(s)	(t)	(u)	(v)	(x)	(y)	(z)	(aa)	(ab)	(ac)
Date		Start-of-day volume AF	End-of-day volume AF	Net change AF	Evap AF	Withdrawl/Release AF	Today's Harvest AF	< This column feeds ET-Soil_Rule		Prev EOD Elevation	Look up volume from elevation	(v)-(p)+'(r)+(s)+(t)	Import net lake evap rate	Import measured pumping	Import measured releases	Import measured elevation	Look up volume from elevation	(t)	Import measured releases for aug source	IF((n)="IN",0,(w)-(x)-(y)	(v)-(z)	Look up target elevation from (aa)	IF((q)>'(r), (q) - (w)+(y) , 0)
2015-03-01		1	1.7	0.7	0.01	0.5	1.19																^daily harvest
2015-03-02		1.7	2.2	0.5	0.01	0.3	0.19
2015-03-03
2015-03-04
2015-03-05
2015-03-06
2015-03-07
2015-03-08
2015-03-09
2015-03-10
2015-03-11
2015-03-12
2015-03-13
2015-03-14
2015-03-15
2015-03-16
2015-03-17
2015-03-18
2015-03-19
2015-03-20
2015-03-21
2015-03-22
2015-03-23
2015-03-24
2015-03-25
2015-03-26
2015-03-27
2015-03-28
2015-03-29
2015-03-30
2015-03-31
2015-04-01
2015-04-02
2015-04-03
2015-04-04
2015-04-05
2015-04-06
2015-04-07
2015-04-08
2015-04-09
2015-04-10
2015-04-11
2015-04-12
2015-04-13
2015-04-14
2015-04-15
2015-04-16
2015-04-17
2015-04-18
2015-04-19
2015-04-20
2015-04-21
2015-04-22
2015-04-23
2015-04-24
2015-04-25
2015-04-26
2015-04-27
2015-04-28
2015-04-29
2015-04-30
2015-05-01
2015-05-02
2015-05-03
2015-05-04
2015-05-05
2015-05-06
2015-05-07
2015-05-08
2015-05-09
2015-05-10
2015-05-11
2015-05-12
2015-05-13
2015-05-14
2015-05-15
2015-05-16
2015-05-17
2015-05-18
2015-05-19
2015-05-20
2015-05-21
2015-05-22
2015-05-23
2015-05-24
2015-05-25
2015-05-26
2015-05-27
2015-05-28
2015-05-29
2015-05-30
2015-05-31
2015-06-01
2015-06-02
2015-06-03
2015-06-04
2015-06-05
2015-06-06
2015-06-07
2015-06-08
2015-06-09
2015-06-10
2015-06-11
2015-06-12
2015-06-13
2015-06-14
2015-06-15
2015-06-16
2015-06-17
2015-06-18
2015-06-19
2015-06-20
2015-06-21
2015-06-22
2015-06-23
2015-06-24
2015-06-25
2015-06-26
2015-06-27
2015-06-28
2015-06-29
2015-06-30
2015-07-01
2015-07-02
2015-07-03
2015-07-04
2015-07-05
2015-07-06
2015-07-07
2015-07-08
2015-07-09
2015-07-10
2015-07-11
2015-07-12
2015-07-13
2015-07-14
2015-07-15
2015-07-16
2015-07-17
2015-07-18
2015-07-19
2015-07-20
2015-07-21
2015-07-22
2015-07-23
2015-07-24
2015-07-25
2015-07-26
2015-07-27
2015-07-28
2015-07-29
2015-07-30
2015-07-31
2015-08-01
2015-08-02
2015-08-03
2015-08-04
2015-08-05
2015-08-06
2015-08-07
2015-08-08
2015-08-09
2015-08-10
2015-08-11
2015-08-12
2015-08-13
2015-08-14
2015-08-15
2015-08-16
2015-08-17
2015-08-18
2015-08-19
2015-08-20
2015-08-21
2015-08-22
2015-08-23
2015-08-24
2015-08-25
2015-08-26
2015-08-27
2015-08-28
2015-08-29
2015-08-30
2015-08-31
2015-09-01
2015-09-02
2015-09-03
2015-09-04
2015-09-05
2015-09-06
2015-09-07
2015-09-08
2015-09-09
2015-09-10
2015-09-11
2015-09-12
2015-09-13
2015-09-14
2015-09-15
2015-09-16
2015-09-17
2015-09-18
2015-09-19
2015-09-20
2015-09-21
2015-09-22
2015-09-23
2015-09-24
2015-09-25
2015-09-26
2015-09-27
2015-09-28
2015-09-29
2015-09-30
2015-10-01
2015-10-02
2015-10-03
2015-10-04
2015-10-05
2015-10-06
2015-10-07
2015-10-08
2015-10-09
2015-10-10
2015-10-11
2015-10-12
2015-10-13
2015-10-14
2015-10-15
2015-10-16
2015-10-17
2015-10-18
2015-10-19
2015-10-20
2015-10-21
2015-10-22
2015-10-23
2015-10-24
2015-10-25
2015-10-26
2015-10-27
2015-10-28
2015-10-29
2015-10-30
2015-10-31

## Sheet: ApplyRules
	This sheet applies the HSG Factors to each storm event and produces a total HND volume, the volume that may be harvested without replacement.																Natural Pervious Area (Acres)	Developed Impervious Area (Acres)	Total Area (Acres)				Natural Pervious Area (Acres)	Developed Impervious Area (Acres)	Total Area (Acres)				Natural Pervious Area (Acres)	Developed Impervious Area (Acres)	Total Area (Acres)				Natural Pervious Area (Acres)	Developed Impervious Area (Acres)	Total Area (Acres)				30-day ET/Soil Factor (AF)
																	0.8	0.2	12				4	2	12				1.5	1.5	12			Acres	1	1	12				6.97167
																		0.0425532						0.425532						0.319149				Percent of Developed		0.212766					^ linked to ET/Soil rule--dynamic based on total harvest in prior 30 days.
										Infiltration Factor Rules:Duration Power fn
	Processed Events from StormCalculator															HSG A						HSG B						HSG C						HSG D						Event Totals on Impervious Areas
Date	Serial Storm	Storm Depth (inches)	Start Timestamp	End Timestamp	Duration (hrs)	Precip Threshold	Season Flag	Storm Depth (inches)		.75yr event	1yr event	2yr event	5yr event	10yr event		Infilt Factor	Infiltration (in)	Infiltration (AF)	Groundwater Return (AF)			Infilt Factor	Infiltration (in)	Infiltration (AF)	Groundwater Return (AF)			Infilt Factor	Infiltration (in)	Infiltration (AF)	Groundwater Return (AF)			Infilt Factor	Infiltration (in)	Infiltration (AF)	Groundwater Return (AF)			Total P on Impervious (AF)	Total Historic Infiltration on Impervious (AF)	Total Groundwater Return on Impervious (AF)	Total HND on Impervious (AF)	Today's Allowable Harvest (AF)
10/1/2015	1	2.96	2015-10-01 00:15:00	2015-10-01 05:30:00	5.25	1	1	2.96		0.784532	1.04598	1.27507	1.66773	2.01128		0.7	2.072	0.0345333	0.00296			0.62	1.8352	0.305867	0.0197333			0.43	1.2728	0.1591	0.0111			0.28	0.8288	0.0690667	0.0074			13.912	0.568567	0.0411933	0.527373	0.785715
10/1/2015	2	1.448	2015-10-01 17:30:00	2015-10-01 18:30:00	1	1	1	1.45		0.4426	0.5901	0.7338	0.9776	1.189		0.7	1.015	0.0169167	0.00145			0.62	0.899	0.149833	0.00966667			0.43	0.6235	0.0779375	0.0054375			0.28	0.406	0.0338333	0.003625			6.815	0.278521	0.0201792	0.258342
#VALUE!					0			0		0	0	0	0	0		0.9	0	0	0			0	0	0	0			0	0	0	0			0	0	0	0			0	0	0	0
#VALUE!					0			0		0	0	0	0	0		0	0	0	0			0	0	0	0			0	0	0	0			0	0	0	0			0	0	0	0
					0			0		0	0	0	0	0		0	0	0	0			0	0	0	0			0	0	0	0			0	0	0	0			0	0	0	0
					0			0		0	0	0	0	0		0	0	0	0			0	0	0	0			0	0	0	0			0	0	0	0			0	0	0	0
					0			0		0	0	0	0	0		0	0	0	0			0	0	0	0			0	0	0	0			0	0	0	0			0	0	0	0
					0			0		0	0	0	0	0		0	0	0	0			0	0	0	0			0	0	0	0			0	0	0	0			0	0	0	0
					0			0		0	0	0	0	0		0	0	0	0			0	0	0	0			0	0	0	0			0	0	0	0			0	0	0	0
